# Supplementary material for: Colorimetric Integrated PCR Protocol for Rapid Detection of Vibrio parahaemolyticus
Source: PubMed Central journal article supplement (PMC5087389; doi:10.3390/s16101600), 2016-09-28
Supplement: sensors-16-01600-s001.pdf [file sensors-16-01600-s001.pdf]

# Supplementary Materials: Colorimetric Integrated PCR Protocol for Rapid Detection of *Vibrio parahaemolyticus*

Kewen Cheng, Daodong Pan, Jun Teng, Li Yao, Yingwang Ye, Feng Xue, Fan Xia and Wei Chen

Table S1. Oligonucleotide primers used in this work.

| Species                    | Target | Primers (5'-3')                                        | Amplicon Size (bp) |
|----------------------------|--------|--------------------------------------------------------|--------------------|
| <i>V. parahaemolyticus</i> | toxR   | GTCTTCTGACGCAATCGTTG<br>ATACGAGTGGTTGCTGTCATG          | 366                |
| <i>V. parahaemolyticus</i> | Tlh    | AAAGCGGATTATGCAGAAGCACTG<br>GCTACT TTCTAGCATTTTCTCTGC  | 450                |
| <i>V. parahaemolyticus</i> | Trh    | TTGGCTTCGATATTTTCAGTATCT<br>CATAACAAACATATGCCCATTTCCG  | 500                |
| <i>V. parahaemolyticus</i> | Tdh    | GTAAAGGTCCTGACTTTTGGAC<br>TGGAATAGAACCTTCATCTTCACC     | 269                |
| <i>Salmonella</i> spp.     | orgC   | CTTATGATGCATTCTACCAACGACTG<br>CCGAATCACCCTGTTAGGA      | 121                |
| <i>L. monocytogenes</i>    | hlyA   | ACTTCGGCGCAATCAGTGA<br>TTGCAACTGCTCTTTAGTAACAGCTT      | 137                |
| <i>S. aureus</i>           | entA   | AAGTGCCGATCAATTTATGGCTA<br>CCTGAACAGTTACATTTTCTTATTCGT | 90                 |
| <i>C. jejuni</i>           | cfrA   | AGCAGGGATAAGCCCTCTTG<br>AGCGATCTATTTGCCAYTCG           | 203                |

In front of the forward primer plus the following sequence: AAAAAATTTACCCAACCCGCCCTA  
CCCAAAAAATTTACCCAACCCGCCCTACCCA AAAAAA.

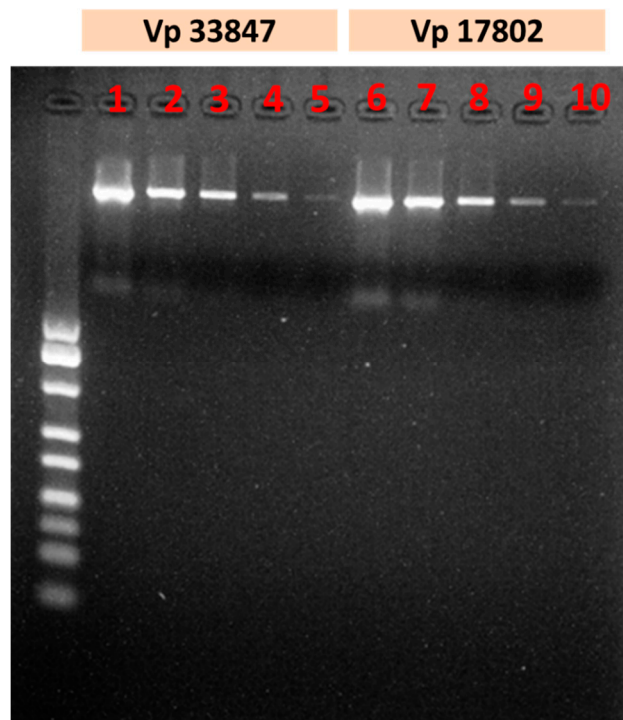

**Figure S1.** The agarose gel electrophoresis results of the extracted genomic DNA from *V. parahaemolyticus* 33847 and 17802. Lane 1–5: the extracted genomic DNA from *V. parahaemolyticus* 33847 with the dilution of 1-, 2-, 8-, 64- and 640-folds; Lane 6–10: the extracted genomic DNA from *V. parahaemolyticus* 17802. The ladder of DNA marker is 500 bp.
